# Supplementary material for: A 3D networked polydiacetylene sensor for enhanced sensitivity
Source: Royal Society of Chemistry journal article supplement (doi:10.1039/c5cc08566g), 2015-11-11
Supplement: c5cc08566g1.pdf [file c5cc08566g1.pdf]

## Supporting Information

### 3D Networked Polydiacetylene Sensor for Enhanced Sensitivity

Subum Lee<sup>a</sup>, Joosub Lee<sup>b</sup>, Dong Wook Lee<sup>a</sup>, Jong-Man Kim<sup>\*b,c</sup> and Haiwon Lee<sup>\*a,c</sup>

<sup>a</sup> *Department of Chemistry, Hanyang University, Seoul 133-791, Korea. E-mail: haiwon@hanyang.ac.kr*

<sup>b</sup> *Department of Chemical Engineering, Hanyang University, Seoul 133-791, Korea. E-mail: jmk@hanyang.ac.kr*

<sup>c</sup> *Institute of Nano Science and Technology, Hanyang University, Seoul 133-791, Korea.*

#### 1. Procedures for 3D networked polydiacetylene sensor

The networked carbon nanotubes (CNTs) was synthesized on the micro-pillar structure. Micro-pillar structure was made on p-type silicon (100) substrate by silicon deep etching process. The micro-pillar structure with diameter of 1  $\mu\text{m}$ , height of 5  $\mu\text{m}$ , and the inter-pillar gap of 4  $\mu\text{m}$  was prepared. Micro-pillar structure was soaked in a piranha solution ( $\text{H}_2\text{SO}_4 : \text{H}_2\text{O}_2 = 7 : 3$ ) for 30 min in order to clean and modify the surface with hydroxyl group. The micro-pillar substrate was fully rinsed with de-ionized (DI) water to remove acid residue and dried with nitrogen gas. 100  $\mu\text{L}$  of 3-aminopropylmethyldiethoxysilane (APMDES) was diluted in 10 mL of toluene (Junsei) in N<sub>2</sub> air condition and the piranha treated micro-pillar substrate was dipped in the APDMES solution for one hour. The substrate was rinsed with toluene for 2 min and it was baked at 120 °C for 10 min.  $\text{Fe}(\text{NO}_3)_3 \cdot 9\text{H}_2\text{O}$  (Junsei), Mo solution (ICP / DCP standard solution, Aldrich), and HPLC grade ethanol (Daejung) was used to make Fe/Mo (molar ratio 7:1) catalyst solution by ultrasonication. Amine terminated micro-pillar substrate was soaked in the catalyst solution for 1 hour and then the substrate was dipped in ethanol for 10 min to remove excess amount of Fe/Mo catalyst. The networked CNTs was synthesized by thermal chemical vapor deposition method.

The substrate was placed in quartz tube reactor and the reactor was heated up to 850 °C for thermal annealing in air. When the reactor reached 850 °C, NH<sub>3</sub> gas (300 sccm) was injected into the reactor for 10 min and followed by 10 sccm of C<sub>2</sub>H<sub>2</sub> gas for 20 min. Synthesized networked CNTs was cooled down to the ambient temperature and to enhance the network, the whole networked CNTs was coated with Al<sub>2</sub>O<sub>3</sub> by atomic layer deposition.

PDA vesicles were coated on two substrates: 3D networked chip and two-dimensional silicon planar substrate. Both Al<sub>2</sub>O<sub>3</sub> coated 3D networked chip and 2D planar substrate were treated with UV O<sub>3</sub> (Jaesung, UVC-30) for 15 min to introduce hydroxyl group on the surface and after they were soaked in APMDES solution to modify the surface with amine group. 10,12-Pentacosadiynoic acid (PCDA) and n-hydroxysuccinimide modified PCDA (PCDA-NHS) were mixed in DI water at 9:1 molar ratio to make 1 mM PDA solution. The PCDA / PCDA-NHS mixture were stabilized at 4 °C for 12 h and the PDA monomers formed vesicles by ultrasonication for 10 min. The PDA solution was diluted to make 0.25 mM PDA solution and the both substrates were incubated in the PDA solution with stirring (800 rpm) for 30 min. After 30 min, the substrates were rinsed with DI water for 2 min and were irradiated with 254 nm UV light (1 mW/cm<sup>2</sup>) for 2 min to induce polymerization.
